# Supplementary material for: Conversion factors for Greenland shelf benthos: Weight-to-weight and body size-to-weight relationships
Source: Copernicus journal article supplement (doi:10.5194/essd-2025-823), 2026-01-23
Supplement: Supplementary file 1 [file S1_Behrisch_Zwerschke.xlsx]

## Sheet: Sheet1
Phylum	Family	Weight Variables	Rho	S	p value	N
Cnidaria	Actinostolidae	AFDM/ DM	1.000	0.000	0.000	3
Cnidaria	Actinostolidae	AFDM/ WM	1.000	0.000	0.000	3
Cnidaria	Actinostolidae	DM/ WM	1.000	0.000	0.000	3
Arthropoda	Aegidae	AFDM/ DM	0.969	48.000	0.000	21
Arthropoda	Aegidae	AFDM/ WM	0.949	78.000	0.000	21
Arthropoda	Aegidae	DM/ WM	0.981	30.000	0.000	21
Cnidaria	Aglaopheniidae	AFDM/ DM	1.000	0.000	0.000	3
Cnidaria	Aglaopheniidae	AFDM/ WM	1.000	0.000	0.000	3
Cnidaria	Aglaopheniidae	DM/ WM	1.000	0.000	0.000	3
Porifera	Ancorinidae	AFDM/ DM	0.927	12.000	0.000	10
Porifera	Ancorinidae	AFDM/ WM	0.927	12.000	0.000	10
Porifera	Ancorinidae	DM/ WM	1.000	0.000	0.000	10
Echinodermata	Antedonidae	AFDM/ DM	1.000	0.000	0.000	6
Echinodermata	Antedonidae	AFDM/ WM	0.941	2.061	0.005	6
Echinodermata	Antedonidae	DM/ WM	0.941	2.061	0.005	6
Annelida	Aphroditidae	AFDM/ DM	0.967	4.000	0.000	9
Annelida	Aphroditidae	AFDM/ WM	0.966	4.051	0.000	9
Annelida	Aphroditidae	DM/ WM	0.983	2.017	0.000	9
Echinodermata	Benthopectinidae	AFDM/ DM	0.933	8.000	0.000	9
Echinodermata	Benthopectinidae	AFDM/ WM	0.900	12.000	0.001	9
Echinodermata	Benthopectinidae	DM/ WM	0.983	2.000	0.000	9
Porifera	Bubaridae	AFDM/ DM	0.500	2.000	0.667	3
Porifera	Bubaridae	DM/ WM	0.500	2.000	0.667	3
Porifera	Bubaridae	AFDM/ WM	1.000	0.000	0.000	3
Mollusca	Buccinidae	AFDM/ DM	0.988	2.000	0.000	10
Mollusca	Buccinidae	AFDM/ WM	1.000	0.000	0.000	10
Mollusca	Buccinidae	DM/ WM	0.988	2.000	0.000	10
Brachiopoda	Cancellothyrididae	AFDM/ DM	0.842	26.000	0.002	10
Brachiopoda	Cancellothyrididae	AFDM/ WM	0.721	46.000	0.019	10
Brachiopoda	Cancellothyrididae	DM/ WM	0.685	52.000	0.029	10
Cnidaria	Capnellidae	AFDM/ DM	0.966	186.000	0.000	32
Cnidaria	Capnellidae	AFDM/ WM	0.968	175.643	0.000	32
Cnidaria	Capnellidae	DM/ WM	0.970	161.632	0.000	32
Porifera	Coelosphaeridae	AFDM/ DM	0.969	62.000	0.000	23
Porifera	Coelosphaeridae	AFDM/ WM	0.965	70.517	0.000	23
Porifera	Coelosphaeridae	DM/ WM	0.971	59.515	0.000	23
Arthropoda	Colossendeidae	AFDM/ WM	0.600	4.000	0.400	4
Arthropoda	Colossendeidae	DM/ WM	0.600	4.000	0.400	4
Arthropoda	Colossendeidae	AFDM/ DM	1.000	0.000	0.000	4
Cnidaria	Coralliidae	AFDM/ DM	0.900	2.000	0.037	5
Cnidaria	Coralliidae	AFDM/ WM	0.900	2.000	0.037	5
Cnidaria	Coralliidae	DM/ WM	1.000	0.000	0.000	5
Chordata	Didemnidae	AFDM/ DM	0.867	22.000	0.001	10
Chordata	Didemnidae	AFDM/ WM	0.841	26.309	0.002	10
Chordata	Didemnidae	DM/ WM	0.963	6.062	0.000	10
Echinodermata	Echinasteridae	AFDM/ DM	1.000	0.000	0.000	10
Echinodermata	Echinasteridae	AFDM/ WM	0.985	2.507	0.000	10
Echinodermata	Echinasteridae	DM/ WM	0.985	2.507	0.000	10
Porifera	Euplectellinae	AFDM/ WM	0.200	8.000	0.800	4
Porifera	Euplectellinae	DM/ WM	0.200	8.000	0.800	4
Porifera	Euplectellinae	AFDM/ DM	1.000	0.000	0.000	4
Porifera	Geodiidae	AFDM/ DM	0.995	8.000	0.000	21
Porifera	Geodiidae	AFDM/ WM	0.939	94.000	0.000	21
Porifera	Geodiidae	DM/ WM	0.922	120.000	0.000	21
Annelida	Golfingiidae	AFDM/ WM	0.700	6.000	0.188	5
Annelida	Golfingiidae	DM/ WM	0.700	6.000	0.188	5
Annelida	Golfingiidae	AFDM/ DM	1.000	0.000	0.000	5
Echinodermata	Gorgonocephalidae	AFDM/ DM	0.964	2.000	0.000	7
Echinodermata	Gorgonocephalidae	AFDM/ WM	0.964	2.000	0.000	7
Echinodermata	Gorgonocephalidae	DM/ WM	1.000	0.000	0.000	7
Mollusca	Hanleyidae	AFDM/ DM	0.964	6.000	0.000	10
Mollusca	Hanleyidae	AFDM/ WM	0.976	4.000	0.000	10
Mollusca	Hanleyidae	DM/ WM	0.976	4.000	0.000	10
Cnidaria	Hormathiidae	AFDM/ DM	0.996	6.000	0.000	21
Cnidaria	Hormathiidae	AFDM/ WM	0.983	26.525	0.000	21
Cnidaria	Hormathiidae	DM/ WM	0.989	16.515	0.000	21
Bryozoa	Horneridae	AFDM/ DM	1.000	0.000	0.000	10
Bryozoa	Horneridae	AFDM/ WM	0.963	6.062	0.000	10
Bryozoa	Horneridae	DM/ WM	0.963	6.062	0.000	10
Echinodermata	Laetmogonidae	AFDM/ DM	0.952	8.000	0.000	10
Echinodermata	Laetmogonidae	AFDM/ WM	1.000	0.000	0.000	10
Echinodermata	Laetmogonidae	DM/ WM	0.952	8.000	0.000	10
Cnidaria	Liponematidae	AFDM/ DM	1.000	0.000	0.000	7
Cnidaria	Liponematidae	AFDM/ WM	0.964	2.000	0.000	7
Cnidaria	Liponematidae	DM/ WM	0.964	2.000	0.000	7
Arthropoda	Lithodidae	AFDM/ DM	1.000	0.000	0.000	3
Arthropoda	Lithodidae	AFDM/ WM	1.000	0.000	0.000	3
Arthropoda	Lithodidae	DM/ WM	1.000	0.000	0.000	3
Echinodermata	Molpadiidae	AFDM/ DM	0.988	2.000	0.000	10
Echinodermata	Molpadiidae	AFDM/ WM	0.988	2.000	0.000	10
Echinodermata	Molpadiidae	DM/ WM	0.976	4.000	0.000	10
Porifera	Mycalidae	AFDM/ DM	0.991	2.000	0.000	11
Porifera	Mycalidae	AFDM/ WM	0.982	4.000	0.000	11
Porifera	Mycalidae	DM/ WM	0.991	2.000	0.000	11
Arthropoda	Nymphonidae	AFDM/ DM	0.991	2.000	0.000	11
Arthropoda	Nymphonidae	AFDM/ WM	0.797	44.742	0.003	11
Arthropoda	Nymphonidae	DM/ WM	0.797	44.742	0.003	11
Echinodermata	Ophiacanthidae	AFDM/ DM	0.929	6.000	0.001	8
Echinodermata	Ophiacanthidae	AFDM/ WM	0.778	18.622	0.023	8
Echinodermata	Ophiacanthidae	DM/ WM	0.840	13.433	0.009	8
Echinodermata	Ophiopholidae	AFDM/ DM	0.918	18.000	0.000	11
Echinodermata	Ophiopholidae	AFDM/ WM	0.945	12.053	0.000	11
Echinodermata	Ophiopholidae	DM/ WM	0.936	14.062	0.000	11
Bryozoa	Phidoloporidae	AFDM/ DM	0.918	18.000	0.000	11
Bryozoa	Phidoloporidae	AFDM/ WM	0.929	15.535	0.000	11
Bryozoa	Phidoloporidae	DM/ WM	0.998	0.501	0.000	11
Porifera	Polymastiidae	AFDM/ DM	0.962	542.000	0.000	44
Porifera	Polymastiidae	AFDM/ WM	0.958	590.851	0.000	44
Porifera	Polymastiidae	DM/ WM	0.962	539.821	0.000	44
Annelida	Polynoidae	AFDM/ WM	0.560	96.719	0.073	11
Annelida	Polynoidae	AFDM/ DM	0.873	28.000	0.000	11
Annelida	Polynoidae	DM/ WM	0.856	31.571	0.001	11
Echinodermata	Poraniidae	AFDM/ DM	0.976	4.000	0.000	10
Echinodermata	Poraniidae	AFDM/ WM	0.927	12.000	0.000	10
Echinodermata	Poraniidae	DM/ WM	0.939	10.000	0.000	10
Echinodermata	Pterasteridae	AFDM/ DM	0.978	64.000	0.000	26
Echinodermata	Pterasteridae	AFDM/ WM	0.949	149.447	0.000	26
Echinodermata	Pterasteridae	DM/ WM	0.974	75.218	0.000	26
Porifera	Rossellidae	AFDM/ DM	0.659	124.000	0.014	13
Porifera	Rossellidae	AFDM/ WM	0.862	50.137	0.000	13
Porifera	Rossellidae	DM/ WM	0.780	80.219	0.002	13
Cnidaria	Sertulariidae	AFDM/ WM	0.300	14.000	0.624	5
Cnidaria	Sertulariidae	DM/ WM	0.400	12.000	0.505	5
Cnidaria	Sertulariidae	AFDM/ DM	0.900	2.000	0.037	5
Echinodermata	Solasteridae	AFDM/ DM	0.989	6.000	0.000	15
Echinodermata	Solasteridae	AFDM/ WM	0.979	11.510	0.000	15
Echinodermata	Solasteridae	DM/ WM	0.981	10.509	0.000	15
Echinodermata	Strongylocentrotidae	AFDM/ DM	0.975	20.000	0.000	17
Echinodermata	Strongylocentrotidae	AFDM/ WM	0.956	36.044	0.000	17
Echinodermata	Strongylocentrotidae	DM/ WM	0.974	21.025	0.000	17
Chordata	Styelidae	AFDM/ DM	1.000	0.000	0.000	3
Chordata	Styelidae	AFDM/ WM	1.000	0.000	0.000	3
Chordata	Styelidae	DM/ WM	1.000	0.000	0.000	3
Porifera	Tetillidae	AFDM/ DM	0.988	2.000	0.000	10
Porifera	Tetillidae	AFDM/ WM	0.988	2.000	0.000	10
Porifera	Tetillidae	DM/ WM	1.000	0.000	0.000	10
Porifera	Theneidae	AFDM/ DM	0.988	2.000	0.000	10
Porifera	Theneidae	AFDM/ WM	0.952	8.000	0.000	10
Porifera	Theneidae	DM/ WM	0.964	6.000	0.000	10
