# Supplementary material for: Conversion factors for Greenland shelf benthos: Weight-to-weight and body size-to-weight relationships
Source: Copernicus journal article supplement (doi:10.5194/essd-2025-823), 2026-01-23
Supplement: Supplementary file 3 [file S2_Behrisch_Zwerschke.xlsx]

## Sheet: Sheet1
Phylum	Family	Morphometrics (predictor variable)	Response Variable	Rho	S	p_value	N
Cnidaria	Actinostolidae	Body length	AFDM	1.000	0.000	0.000	3
Cnidaria	Actinostolidae	Body length	DM	1.000	0.000	0.000	3
Cnidaria	Actinostolidae	Body length	WM	1.000	0.000	0.000	3
Arthropoda	Aegidae	Body length	AFDM	0.833	256.583	0.000	21
Arthropoda	Aegidae	Body length	DM	0.898	157.551	0.000	21
Arthropoda	Aegidae	Body length	WM	0.910	138.545	0.000	21
Cnidaria	Aglaopheniidae	Body length	AFDM	-0.500	6.000	0.667	3
Cnidaria	Aglaopheniidae	Body length	DM	-0.500	6.000	0.667	3
Cnidaria	Aglaopheniidae	Body length	WM	-0.500	6.000	0.667	3
Porifera	Ancorinidae	Body diameter	AFDM	0.927	12.000	0.000	10
Porifera	Ancorinidae	Body diameter	DM	0.952	8.000	0.000	10
Porifera	Ancorinidae	Body diameter	WM	0.952	8.000	0.000	10
Echinodermata	Antedonidae	Body length	AFDM	0.600	14.000	0.208	6
Echinodermata	Antedonidae	Body length	DM	0.600	14.000	0.208	6
Echinodermata	Antedonidae	Body length	WM	0.577	14.811	0.231	6
Annelida	Aphroditidae	Body length	AFDM	0.695	36.652	0.038	9
Annelida	Aphroditidae	Body length	DM	0.803	23.597	0.009	9
Annelida	Aphroditidae	Body length	WM	0.766	28.078	0.016	9
Echinodermata	Benthopectinidae	Outer diameter	AFDM	0.817	22.000	0.007	9
Echinodermata	Benthopectinidae	Outer diameter	DM	0.833	20.000	0.005	9
Echinodermata	Benthopectinidae	Outer diameter	WM	0.850	18.000	0.004	9
Porifera	Bubaridae	Body length	DM	0.500	2.000	0.667	3
Porifera	Bubaridae	Body length	AFDM	1.000	0.000	0.000	3
Porifera	Bubaridae	Body length	WM	1.000	0.000	0.000	3
Mollusca	Buccinidae	Body length	AFDM	0.985	2.507	0.000	10
Mollusca	Buccinidae	Body length	DM	0.960	6.519	0.000	10
Mollusca	Buccinidae	Body length	WM	0.985	2.507	0.000	10
Brachiopoda	Cancellothyrididae	Body length	AFDM	0.455	90.000	0.187	10
Brachiopoda	Cancellothyrididae	Body length	DM	0.479	86.000	0.162	10
Brachiopoda	Cancellothyrididae	Body length	WM	0.321	112.000	0.365	10
Cnidaria	Capnellidae	Body length	AFDM	0.904	524.000	0.000	32
Cnidaria	Capnellidae	Body length	DM	0.896	570.000	0.000	32
Cnidaria	Capnellidae	Body length	WM	0.920	437.859	0.000	32
Porifera	Coelosphaeridae	Body diameter	AFDM	0.662	684.669	0.001	23
Porifera	Coelosphaeridae	Body diameter	DM	0.633	742.683	0.001	23
Porifera	Coelosphaeridae	Body diameter	WM	0.730	546.270	0.000	23
Arthropoda	Colossendeidae	Carapax length	WM	0.500	2.000	0.667	4
Arthropoda	Colossendeidae	Carapax length	AFDM	1.000	0.000	0.000	4
Arthropoda	Colossendeidae	Carapax length	DM	1.000	0.000	0.000	4
Cnidaria	Coralliidae	Body length	AFDM	0.900	2.000	0.037	5
Cnidaria	Coralliidae	Body length	DM	1.000	0.000	0.000	5
Cnidaria	Coralliidae	Body length	WM	1.000	0.000	0.000	5
Chordata	Didemnidae	Body length	AFDM	0.539	76.000	0.108	10
Chordata	Didemnidae	Body length	DM	0.770	38.000	0.009	10
Chordata	Didemnidae	Body length	WM	0.644	58.704	0.044	10
Echinodermata	Echinasteridae	Outer diameter	AFDM	0.952	8.000	0.000	10
Echinodermata	Echinasteridae	Outer diameter	DM	0.952	8.000	0.000	10
Echinodermata	Echinasteridae	Outer diameter	WM	0.948	8.525	0.000	10
Porifera	Euplectellinae	Body length	AFDM	0.400	6.000	0.600	4
Porifera	Euplectellinae	Body length	DM	0.400	6.000	0.600	4
Porifera	Euplectellinae	Body length	WM	0.800	2.000	0.200	4
Porifera	Geodiidae	Body diameter	AFDM	0.931	106.069	0.000	21
Porifera	Geodiidae	Body diameter	DM	0.903	150.097	0.000	21
Porifera	Geodiidae	Body diameter	WM	0.972	43.028	0.000	21
Annelida	Golfingiidae	Body length	AFDM	0.600	8.000	0.285	5
Annelida	Golfingiidae	Body length	DM	0.600	8.000	0.285	5
Annelida	Golfingiidae	Body length	WM	0.900	2.000	0.037	5
Echinodermata	Gorgonocephalidae	Disk diameter	DM	0.714	16.000	0.071	7
Echinodermata	Gorgonocephalidae	Disk diameter	WM	0.714	16.000	0.071	7
Echinodermata	Gorgonocephalidae	Disk diameter	AFDM	0.786	12.000	0.036	7
Mollusca	Hanleyidae	Body length	AFDM	0.903	16.000	0.000	10
Mollusca	Hanleyidae	Body length	DM	0.952	8.000	0.000	10
Mollusca	Hanleyidae	Body length	WM	0.952	8.000	0.000	10
Cnidaria	Hormathiidae	Body length	AFDM	0.678	496.000	0.001	21
Cnidaria	Hormathiidae	Body length	DM	0.709	448.000	0.000	21
Cnidaria	Hormathiidae	Body length	WM	0.755	377.868	0.000	21
Bryozoa	Horneridae	Body length	AFDM	0.539	76.000	0.108	10
Bryozoa	Horneridae	Body length	DM	0.539	76.000	0.108	10
Bryozoa	Horneridae	Body length	WM	0.546	74.901	0.102	10
Echinodermata	Laetmogonidae	Body length	AFDM	0.915	14.000	0.000	10
Echinodermata	Laetmogonidae	Body length	DM	0.964	6.000	0.000	10
Echinodermata	Laetmogonidae	Body length	WM	0.915	14.000	0.000	10
Cnidaria	Liponematidae	Body diameter	WM	0.750	14.000	0.052	7
Cnidaria	Liponematidae	Body diameter	AFDM	0.786	12.000	0.036	7
Cnidaria	Liponematidae	Body diameter	DM	0.786	12.000	0.036	7
Arthropoda	Lithodidae	Carapax length	AFDM	1.000	0.000	0.000	3
Arthropoda	Lithodidae	Carapax length	DM	1.000	0.000	0.000	3
Arthropoda	Lithodidae	Carapax length	WM	1.000	0.000	0.000	3
Echinodermata	Molpadiidae	Body length	AFDM	0.988	2.000	0.000	10
Echinodermata	Molpadiidae	Body length	DM	0.976	4.000	0.000	10
Echinodermata	Molpadiidae	Body length	WM	1.000	0.000	0.000	10
Porifera	Mycalidae	Body length	AFDM	0.964	8.000	0.000	11
Porifera	Mycalidae	Body length	DM	0.973	6.000	0.000	11
Porifera	Mycalidae	Body length	WM	0.945	12.000	0.000	11
Arthropoda	Nymphonidae	Carapax length	AFDM	0.735	58.263	0.010	11
Arthropoda	Nymphonidae	Carapax length	DM	0.721	61.277	0.012	11
Arthropoda	Nymphonidae	Carapax length	WM	0.820	39.672	0.002	11
Echinodermata	Ophiacanthidae	Disk diameter	AFDM	0.262	62.000	0.531	8
Echinodermata	Ophiacanthidae	Disk diameter	DM	0.357	54.000	0.385	8
Echinodermata	Ophiacanthidae	Disk diameter	WM	0.346	54.943	0.401	8
Echinodermata	Ophiopholidae	Disk diameter	AFDM	0.836	36.000	0.001	11
Echinodermata	Ophiopholidae	Disk diameter	DM	0.773	50.000	0.005	11
Echinodermata	Ophiopholidae	Disk diameter	WM	0.767	51.231	0.006	11
Bryozoa	Phidoloporidae	Body length	AFDM	0.882	26.000	0.000	11
Bryozoa	Phidoloporidae	Body length	DM	0.855	32.000	0.001	11
Bryozoa	Phidoloporidae	Body length	WM	0.875	27.562	0.000	11
Porifera	Polymastiidae	Body diameter	AFDM	0.763	3370.000	0.000	44
Porifera	Polymastiidae	Body diameter	DM	0.784	3058.000	0.000	44
Porifera	Polymastiidae	Body diameter	WM	0.769	3283.465	0.000	44
Annelida	Polynoidae	Body length	AFDM	0.018	162.000	0.960	11
Annelida	Polynoidae	Body length	DM	0.261	122.000	0.467	11
Annelida	Polynoidae	Body length	WM	0.395	99.802	0.258	11
Echinodermata	Poraniidae	Outer diameter	AFDM	0.964	6.000	0.000	10
Echinodermata	Poraniidae	Outer diameter	DM	0.988	2.000	0.000	10
Echinodermata	Poraniidae	Outer diameter	WM	0.964	6.000	0.000	10
Echinodermata	Pterasteridae	Outer diameter	AFDM	0.778	650.000	0.000	26
Echinodermata	Pterasteridae	Outer diameter	DM	0.863	402.000	0.000	26
Echinodermata	Pterasteridae	Outer diameter	WM	0.891	319.972	0.000	26
Porifera	Rossellidae	Body length	AFDM	0.385	224.000	0.194	13
Porifera	Rossellidae	Body length	DM	0.769	84.000	0.002	13
Porifera	Rossellidae	Body length	WM	0.614	140.385	0.025	13
Cnidaria	Sertulariidae	Body length	WM	0.400	12.000	0.505	5
Cnidaria	Sertulariidae	Body length	AFDM	0.900	2.000	0.037	5
Cnidaria	Sertulariidae	Body length	DM	1.000	0.000	0.000	5
Echinodermata	Solasteridae	Outer diameter	AFDM	0.968	18.000	0.000	15
Echinodermata	Solasteridae	Outer diameter	DM	0.968	18.000	0.000	15
Echinodermata	Solasteridae	Outer diameter	WM	0.981	10.509	0.000	15
Echinodermata	Strongylocentrotidae	Body diameter	AFDM	0.924	62.150	0.000	17
Echinodermata	Strongylocentrotidae	Body diameter	DM	0.948	42.101	0.000	17
Echinodermata	Strongylocentrotidae	Body diameter	WM	0.921	64.236	0.000	17
Chordata	Styelidae	Body diameter	AFDM	0.500	2.000	0.667	3
Chordata	Styelidae	Body diameter	DM	0.500	2.000	0.667	3
Chordata	Styelidae	Body diameter	WM	0.500	2.000	0.667	3
Porifera	Tetillidae	Body diameter	AFDM	0.976	4.000	0.000	10
Porifera	Tetillidae	Body diameter	DM	0.964	6.000	0.000	10
Porifera	Tetillidae	Body diameter	WM	0.964	6.000	0.000	10
Porifera	Theneidae	Body diameter	AFDM	0.964	6.000	0.000	10
Porifera	Theneidae	Body diameter	DM	0.952	8.000	0.000	10
Porifera	Theneidae	Body diameter	WM	0.915	14.000	0.000	10
